# Supplementary material for: Ltc1 is an ER-localized sterol transporter and a component of ER–mitochondria and ER–vacuole contacts
Source: PubMed Central journal article supplement — J Cell Biol. 2015 May 25;209(4):539–48. doi: 10.1083/jcb.201502033 (PMC4442815; doi:10.1083/jcb.201502033), 2015-05-25
Supplement: supp_jcb.201502033_JCB_201502033_sm.pdf [file supp_jcb.201502033_JCB_201502033_sm.pdf]

Murley et al., <http://www.jcb.org/cgi/content/full/jcb.201502033/DC1>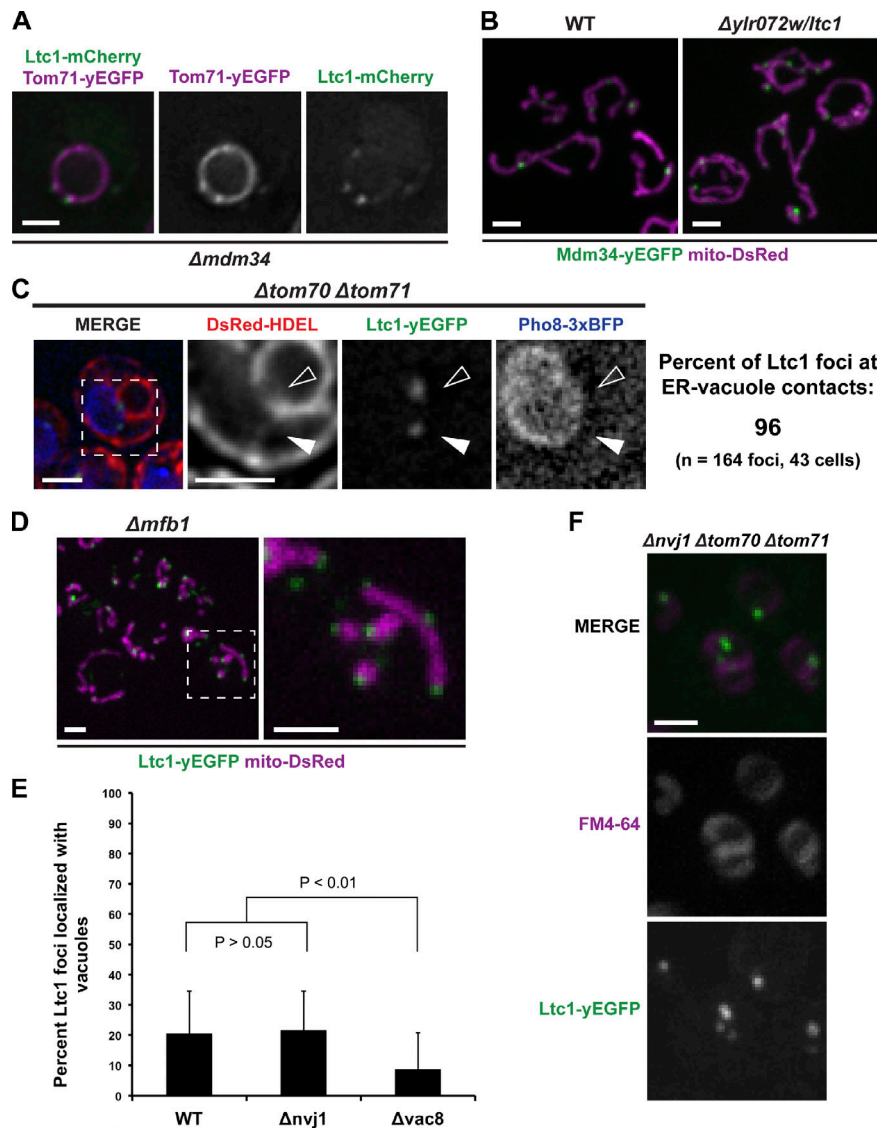

**Figure S1. Characterization of Ltc1 localization in cells.** (A) Ltc1 localization to mitochondria is ERMES independent.  $\Delta mdm34$  cells expressing Ltc1-yEmCherry and Tom71-yEGFP were grown to mid-log phase and imaged as described in "Fluorescence microscopy." Ltc1 foci predominately localize with Tom71 (87.5%;  $n = 27$  cells), similar to Ltc1 localization to ER-mitochondria contacts in WT cells (Fig. 1 E). (B) ERMES foci formation is independent of Ltc1. WT and  $\Delta ltc1$  cells expressing Mdm34-yEGFP and mito-DsRed were grown to mid-log phase and imaged as described in "Fluorescence microscopy." (C) Nonmitochondrial Ltc1 foci localize to ER-vacuole contact sites in  $\Delta tom70 \Delta tom71$  cells.  $\Delta tom70 \Delta tom71$  cells expressing Ltc1-yEGFP, ER-targeted DsRed (DsRed-HDEL), and the vacuole marker Pho8-3xBFP were grown to mid-log phase and imaged as described in "Fluorescence microscopy." The dashed boxed marks a region enlarged and separated into grayscale images for each channel to the right of the merged image. Open arrowheads indicate NVJs; closed arrowheads indicate other ER-vacuole contact sites. (D) Ltc1-yEGFP localization is independent of Mfb1.  $\Delta mfb1$  cells expressing Ltc1-yEGFP and mito-DsRed were grown to mid-log phase and imaged as described in "Fluorescence microscopy." Images represent a maximum intensity z-projection. The dashed box denotes the enlarged region shown to the right. (E and F) Localization of Ltc1-yEGFP to vacuoles is not dependent on Nvj1. WT,  $\Delta vac8$ ,  $\Delta nvj1$ , and  $\Delta nvj1 \Delta tom70 \Delta tom71$  cells expressing Ltc1-yEGFP were grown overnight in YPD media with 1  $\mu$ M FM4-64 dye to label vacuoles and imaged as described in "Fluorescence microscopy." Localization of Ltc1-yEGFP in E was assessed in 3- $\mu$ m sections from the center of cells. The proportion of Ltc1-yEGFP foci localized to vacuoles per cell is plotted, and  $n = 110$ , 155, and 82 cells analyzed in WT,  $\Delta nvj1$ , and  $\Delta vac8$ , respectively. Vacuoles were fragmented (more than five vacuoles per cell) in a significant proportion of  $\Delta vac8$  cells and occupied a large fraction of cell volume that precluded an analysis of the significance of Ltc1-yEGFP localization. Error bars represent the standard error. P-values were calculated using one-way ANOVA with Turkey's honest significant difference. Bars, 2  $\mu$ m.

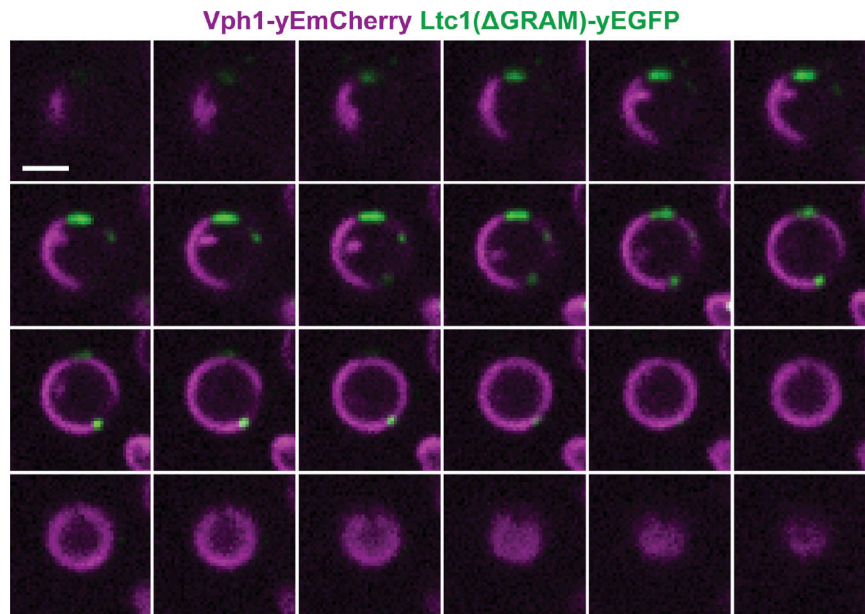

Figure S2. **Additional example of Ltc1( $\Delta$ GRAM) localization relative to Vph1-yEmCherry.** Depicted is a z-series montage of a yeast cell expressing Ltc1( $\Delta$ GRAM)-yEGFP Vph1-yEmCherry. Cells were grown to mid-log phase in synthetic dextrose medium for 12 generations and imaged as described in "Fluorescence microscopy." Bar, 2  $\mu$ m.

**Table S1, included as a separate Excel file, lists strains used in this study.**
